# Supplementary material for: Main Approaches to Enhance Radiosensitization in Cancer Cells by Nanoparticles: A Systematic Review
Source: PubMed Central journal article supplement (PMC8046397; doi:10.34172/apb.2021.025), 2020-07-13
Supplement: apb-11-212-s001.pdf [file apb-11-212-s001.pdf]

Supplementary file 1

Table S1. A summary of the results and main factors on the radiation dose enhancement in each study

| Ref. | Author Name         | Year | Country | SD             | NPs | Size (nm)  | Con           | Dose  | Exposed | Cell line  | Mechanism          | DEF or SER         |
|------|---------------------|------|---------|----------------|-----|------------|---------------|-------|---------|------------|--------------------|--------------------|
| 30   | Chien et al         | 2007 | -       | In vitro       | Au  | 20         | 1 mM          | -     | 6 MeV   | CT-26      | -                  | 1.19               |
| 31   | Liu et al           | 2010 | Taiwan  | In vitro       | Au  | 6.1        | 0.5 mM        | -     | 6.5 keV | CT-26      | Apoptosis          | 2                  |
|      |                     |      |         |                |     |            |               |       | 160 kVp |            |                    | 1.1                |
|      |                     |      |         |                |     |            |               |       | 6 MeV   |            |                    | 1                  |
| 32   | Bobyk et al         | 2013 | France  | In vitro       | Au  | 1.9        | 50 mM         | 6 Gy  | 50 keV  | F98 glioma | DNA damage         | 1.92               |
|      |                     |      |         |                |     | 15         |               |       |         |            |                    | 1.40               |
|      |                     |      |         |                |     | 1.9 and 15 | 76 mM         | 15 Gy | 88 keV  | F98 glioma | -                  |                    |
| 33   | Butterworth et al   | 2010 | UK      | In vitro       | Au  | 1.9        | 50 and 500 mM | -     | 160 kVp | L 132      | ROS and DNA damage | 0.86 and 0.87      |
|      |                     |      |         |                |     |            |               |       |         | Astro      |                    | 1.04 and 0.96      |
|      |                     |      |         |                |     |            |               |       |         | AGO        |                    | 1.16 and 1.97      |
|      |                     |      |         |                |     |            |               |       |         | T98G       |                    | 1.30 and 1.91      |
|      |                     |      |         |                |     |            |               |       |         | MDA 231    |                    | 1.67 and 1.11      |
|      |                     |      |         |                |     |            |               |       |         | MCF7       |                    | 1.41 and 1.09      |
|      |                     |      |         |                |     |            |               |       |         | PC3        |                    | 1.07 and 1.02      |
|      |                     |      |         |                |     |            |               |       |         | DU145      |                    | 0.98 and 0.81      |
| 34   | Chattopadhyay et al | 2013 | Canada  | In vitro       | Au  | 30         | 12 mM         | 11 Gy | 100 kVp | MDA-MB-361 | DNA damage         | 1.6 (targeted)     |
|      |                     |      |         |                |     |            |               |       |         |            |                    | 1.3 (non-targeted) |
| 35   | Chen et al          | 2015 | China   | In vitro       | Au  | 18         | 182 mM        | -     | 160 kVp | U87        | Apoptosis          | 1.37               |
|      |                     |      |         | In vivo (mice) |     | 18         | 6.5 mM        |       |         | U87        |                    | -                  |
| 36   | Chithrani et al     | 2010 | Canada  | In vitro       | Au  | 50         | 1mM           | -     | 150 kVp | HeLa       | DNA                | 1.66               |

Supplementary file 1

|    |                 |      |        |          |    |       |          |      |                 |                       |                           |                                                       |
|----|-----------------|------|--------|----------|----|-------|----------|------|-----------------|-----------------------|---------------------------|-------------------------------------------------------|
|    |                 |      |        |          |    |       |          |      | 220 kVp         |                       |                           | 1.43                                                  |
|    |                 |      |        |          |    |       |          |      | 660 keV         |                       |                           | 1.18                                                  |
|    |                 |      |        |          |    |       |          |      | 6 MV            |                       |                           | 1.17                                                  |
| 37 | Coulter et al   | 2012 | UK     | In vitro | Au | 1.9   | 0.012 mM | 3 Gy | 160 kVp         | DU14, MDA-MB-23, L132 | ROS and cell cycle arrest | -                                                     |
| 38 | Cui et al       | 2014 | Canada | In vitro | Au | 2.7   | 2.53 mM  | -    | 225 kVp         | MDA-MB-231            | Apoptosis                 | 1.04 -1.44 related to different incubation time       |
| 39 | Geng et al      | 2011 | China  | In vitro | Au | 14.37 | -        | -    | 90 kVp and 6 MV | SK-OV-3               | ROS                       | -                                                     |
| 40 | Jain et al      | 2014 | UK     | In vitro | Au | 1.9   | 0.012 mM | -    | 160 kVp         | MDA-MB-231            | -                         | 1.01 -1.41 related to different oxygen concentrations |
| 41 | Jain et al      | 2011 | UK     | In vitro | Au | 1.9   | 0.012 mM | -    | 160 kVp         | L132                  | DNA damage                | 1.05                                                  |
|    |                 |      |        |          |    |       |          |      | 6 MeV           |                       |                           | 1.08                                                  |
|    |                 |      |        |          |    |       |          |      | 160 kVp         | DU145                 |                           | 0.92                                                  |
|    |                 |      |        |          |    |       |          |      | 6 MeV           |                       |                           | 1.13                                                  |
|    |                 |      |        |          |    |       |          |      | 160 kVp         | MDA-MB-231            |                           | 1.41                                                  |
|    |                 |      |        |          |    |       |          |      | 6 MeV           |                       |                           | 1.29                                                  |
|    |                 |      |        |          |    |       |          |      | 15 MeV          |                       |                           | 1.16                                                  |
| 42 | Joh et al       | 2013 | USA    | In vitro | Au | 12    | 1 mM     | 4 Gy | 150 kVp         | U251                  | DNA damage                | 1.3                                                   |
| 43 | Kaur et al      | 2013 | India  | In vitro | Au | 5-15  | 0.027 mM | -    | Co-60           | HeLa                  | -                         | 1.52                                                  |
|    |                 |      |        |          |    |       |          |      | 62 MeV          |                       |                           | 1.39                                                  |
| 44 | Khoshgard et al | 2014 | Iran   | In vitro | Au | 50    | 0.050 mM | -    | 120 kVp         | HeLa                  | Apoptosis and ROS         | 1.40                                                  |
|    |                 |      |        |          |    |       |          |      | 180 kVp         |                       |                           | 1.43                                                  |

Supplementary file 1

|    |               |      |           |          |         |      |          |      |         |            |                   |                                               |
|----|---------------|------|-----------|----------|---------|------|----------|------|---------|------------|-------------------|-----------------------------------------------|
|    |               |      |           |          |         |      |          |      | 200 kVp |            |                   | 1.39                                          |
|    |               |      |           |          |         |      |          |      | 250 kVp |            |                   | 1.39                                          |
|    |               |      |           |          |         |      |          |      | Co-60   |            |                   | 1.03                                          |
| 45 | Kong et al    | 2008 | Canada    | In vitro | Au      | 10.8 | 0.015 mM | -    | 220 kVp | MCF-7      | -                 | 1.3                                           |
| 46 | Liu et al     | 2008 | Taiwan    | In vitro | Au      | 4.7  | 0.5 mM   | -    | 6 MeV   | CT26       | Cell cycle arrest | -                                             |
| 47 | Rahman et al  | 2009 | Australia | In vitro | Au      | 1.9  | 1 mM     | -    | 80 kVp  | BAEC       | -                 | 2.46                                          |
|    |               |      |           |          |         |      |          |      | 150 kVp |            |                   | 2.2                                           |
|    |               |      |           |          | Au      | 1.9  | 0.5 mM   |      | 80 kVp  | BAEC       |                   | 2.0                                           |
|    |               |      |           |          | 150 kVp | 1.4  |          |      |         |            |                   |                                               |
| 48 | Roa et al     | 2009 | Canada    | In vitro | Au      | 10.8 | 15 nM    | -    | 662 keV | DU-145     | Cell cycle arrest | 1.22-1.37 after treating cells for 2 and 6 h. |
| 49 | Taggart et al | 2014 | Ireland   | In vitro | Au      | 1.9  | 2538 mM  | 2 Gy | 225 kVp | MDA-MB-231 | DNA damage        | 1.23                                          |
|    |               |      |           |          |         |      |          | 4 Gy |         |            |                   | 1.20                                          |
|    |               |      |           |          |         |      |          | 8 Gy |         |            |                   | 1.17                                          |
|    |               |      |           |          |         |      |          | 2 Gy |         | DU-145     |                   | 1.01                                          |
|    |               |      |           |          |         |      |          | 4 Gy |         |            |                   | 1.06                                          |
|    |               |      |           |          |         |      |          | 8 Gy |         |            |                   | 1.1                                           |
|    |               |      |           |          |         |      |          | 2 Gy |         | T98G       |                   | 1.90                                          |
|    |               |      |           |          |         |      |          | 4 Gy |         |            |                   | 1.57                                          |
|    |               |      |           |          |         |      |          | 8 Gy |         |            |                   | 1.35                                          |
| 50 | Wang et al    | 2013 | China     | In vitro | Au      | 13   | 20 nM    | -    | 6 MeV   | A549       | Apoptosis         | 1.49                                          |
| 51 | Wang et al    | 2015 | China     | In vitro | Au      | 16   | 20 nM    | -    | 6 MeV   | MDA-MB-231 | ROS               | 1.49                                          |
|    |               |      |           |          |         | 49   |          |      |         |            |                   | 1.86                                          |

Supplementary file 1

|    |                    |      |        |          |                                    |      |          |                         |          |        |                    |                        |
|----|--------------------|------|--------|----------|------------------------------------|------|----------|-------------------------|----------|--------|--------------------|------------------------|
| 52 | Zhang et al        | 2008 | Canada | In vitro | Au                                 | 30   | 15 nM    | -                       | 200 kVp  | DU-145 | Apoptosis          | 1.5-2                  |
| 53 | Zhang et al        | 2012 | Canada | In vitro | Au                                 | 4.8  | 0.05 mM  | -                       | 662 keV  | HeLa   | Apoptosis          | 1.41                   |
|    |                    |      |        |          |                                    | 12.1 |          |                         |          |        |                    | 1.65                   |
|    |                    |      |        |          |                                    | 27.3 |          |                         |          |        |                    | 1.58                   |
|    |                    |      |        |          |                                    | 46.6 |          |                         |          |        |                    | 1.42                   |
| 54 | Zhang et al        | 2014 | Canada | In vitro | Au                                 | 2    | 253 mM   | -                       | 662 keV  | HeLa   | DNA damage         | 1.3                    |
| 55 | Maggiorella et al  | 2016 | France | In vitro | Hf                                 | 50   | -        | -                       | 6 MeV    | HT1080 | -                  | 1.80                   |
| 56 | Brun et al         | 2009 | France | In vitro | Au                                 | 8    | 5 nM     | -                       | 49 keV   | DNA    | DNA damage         | 1                      |
|    |                    |      |        |          |                                    | 20   |          |                         |          |        |                    | 1.75                   |
|    |                    |      |        |          |                                    | 37   |          |                         |          |        |                    | 1.76                   |
|    |                    |      |        |          |                                    | 74   |          |                         |          |        |                    | 2.65                   |
|    |                    |      |        |          |                                    | 92   |          |                         |          |        |                    | 2.95                   |
| 57 | Yang et al         | 2008 | USA    | In vitro | CdSi@ ZnS                          | 2.1  | -        | -                       | 6 MeV    | H460   | -                  | 0.631                  |
| 58 | Štefančíková et al | 2014 | France | In vitro | <i>GdBN</i>                        | 3    | 0.5 mM   | -                       | 1.25 MeV | U87    | -                  | 0.23                   |
| 59 | Zhao et al         | 2012 | China  | In vitro | Fe <sub>3</sub> O <sub>4</sub> @Ag | 30   | 50 µg/L  | 0, 1, 2, 4, 6, and 8 Gy | -        | CNE    | Apoptosis          | 2.262                  |
| 60 | Yi et al           | 2016 | China  | In vitro | <i>Au@MnO<sub>2</sub></i>          | 50   | 20 µg/mL | 6 Gy                    | 160 keV  | 4T1    | ROS and DNA damage | Significant DNA damage |
| 61 | Rezaee et al       | 2017 | Iran   | In vitro | <i>Au</i>                          | 99   | 0.1 mM   | -                       | 6 MV     | HT-29  | Apoptosis          | 1.17                   |
|    |                    |      |        |          |                                    |      |          |                         |          | CHO    |                    | 1.15                   |

Supplementary file 1

|    |                  |      |       |          |                                |     |           |            |             |         |                          |                                       |
|----|------------------|------|-------|----------|--------------------------------|-----|-----------|------------|-------------|---------|--------------------------|---------------------------------------|
| 62 | Gong et al       | 2018 | China | In vitro | TaOx@MnO <sub>2</sub>          | 100 | 25 µg/mL  | -          | 6 Gy        | 4T1     | ROS                      | Remarkably promote the efficacy of RT |
| 63 | Darfarin et al   | 2018 | Iran  | In vitro | AuN@SiO <sub>2</sub>           | 23  | 200 mg/mL | 2, 4, 8 Gy | 6 and 18 MV | MCF-7   | Cell cycle and apoptosis | -                                     |
|    |                  |      |       |          | AuS@SiO <sub>2</sub>           | 31  |           |            |             |         |                          |                                       |
| 64 | Zabihzadeh et al | 2018 | Iran  | In vitro | Au                             | 24  | -         | -          | 18 MV       | HT-29   | DNA damage               | 1.25                                  |
| 65 | Ahn et al        | 2017 | Korea | In vitro | Au                             | -   | 10 mM     | 2 Gy       | -           | PC-3    | -                        | SER was 1.21                          |
| 66 | Alqathami et al  | 2016 | USA   | -        | Bi <sub>2</sub> O <sub>3</sub> | 50  | 0.5 mM    | -          | 100 kV      | phantom | -                        | 1.90                                  |
|    |                  |      |       |          | Au                             |     |           |            |             |         |                          | 1.77                                  |
|    |                  |      |       |          | Bi <sub>2</sub> S <sub>3</sub> | 5   | 0.25 mM   |            | 150 kV      |         |                          | 1.38                                  |
|    |                  |      |       |          | Au                             |     |           |            |             |         |                          | 1.51                                  |
|    |                  |      |       |          | Bi <sub>2</sub> O <sub>3</sub> | 50  | 0.1 mM    |            | 100 kV      |         |                          | 1.52                                  |
|    |                  |      |       |          | Au                             |     |           |            |             |         |                          | 1.45                                  |
| 67 | Antosh et al     | 2015 | USA   | In vitro | Au                             | 1.4 | -         | -          | 250 kVp     | A549    | DNA damage               | -                                     |
| 68 | Banaee et al     | 2016 | Iran  | -        | ZnO                            | -   | 6150 mM   | 10 Gy      | 6 MV        | phantom | -                        | 1.57                                  |
|    |                  |      |       |          |                                |     | 12300 mM  |            |             |         |                          | 1.69                                  |
|    |                  |      |       |          |                                |     | 36900 mM  |            |             |         |                          | 1.78                                  |
|    |                  |      |       |          |                                |     | 49200 mM  |            |             |         |                          | 1.82                                  |
| 69 | Baronia et al    | 2018 | India | In vitro | Au                             | 2-4 | -         | 2 Gy       | -           | PC3     | -                        | -                                     |
| 70 | Behrouzki et al  | 2019 | Iran  | In vitro | Au                             | 30  | 2.53 mM   | -          | 6 MV        | Gel     | -                        | 1.1                                   |
|    |                  |      |       |          |                                | 50  |           |            |             |         |                          | 1.17                                  |

Supplementary file 1

|    |                |      |           |                          |                                |         |                 |                  |                 |                     |                                 |                     |
|----|----------------|------|-----------|--------------------------|--------------------------------|---------|-----------------|------------------|-----------------|---------------------|---------------------------------|---------------------|
|    |                |      |           |                          |                                | 100     |                 |                  |                 |                     |                                 | 1.12                |
| 71 | Choi et al     | 2018 | Korea     | In vivo (12 BALB/C mice) | Au                             | 20      | 0.039 mM        | 0-6 Gy           | -               | MDAMB-231           | ROS                             | -                   |
| 72 | Cruje et al    | 2015 | Ca        | In vitro                 | Au                             | 14      | -               | -                | 220 kVp         | HeLa and MDA-MB-231 | -                               | -                   |
| 73 | Cui et al      | 2017 | Ca        | In vitro                 | Au                             | 6       | 2.53 mM         | -                | 225 kV          | MDA-MB-231          | Apoptosis                       | 1.14                |
| 74 | Delrme et al   | 2017 | Fr        | In vitro                 | Gd                             | 3       | 13.37 mM        | 4 Gy             | 1.25 MV (Co 60) | F98                 | DNA damage                      | 1.2                 |
| 75 | Engels et al   | 2016 | Australia | In vitro                 | Ta <sub>2</sub> O <sub>5</sub> | -       | 0.113 - 1.13 mM | -                | 90 keV          | 9L                  | DNA damage                      | -                   |
| 76 | Farahani et al | 2017 | Iran      | -                        | Bi <sub>2</sub> O <sub>3</sub> | 40      | 0.1 mM          | -                | Co-60           | Gel                 | Apoptosis                       | 30% enhancement     |
|    |                |      |           |                          | Gd <sub>2</sub> O <sub>3</sub> |         |                 |                  |                 |                     |                                 | 21% enhancement     |
| 77 | Hainfeld et al | 2004 | USA       | In vivo (Balb/C mice)    | Au                             | 2       | -               | -                | 250 kVp         | Balb/C              | -                               | -                   |
| 78 | Hauser et al   | 2016 | USA       | In vitro                 | Fe <sub>2</sub> O <sub>3</sub> | 9-12    | 626 mM          | 5 Gy             | -               | A549                | ROS                             | -                   |
| 79 | Huang et al    | 2015 | USA       | In vitro                 | Au                             | 50 nm   | 0.140 mM        | 4 Gy             | 6 MV            | MDA-MB-231          | DNA damage                      | 1.1                 |
|    |                |      |           |                          |                                |         |                 | 2 Gy             | 225 kVp         |                     |                                 | 1.5                 |
| 80 | Zhang et al    | 2018 | China     | In vitro                 | Au                             | 6.3±1.1 | 400 nM          | 6 Gy             | 6 MV            | LS180               | Apoptosis                       | -                   |
| 81 | Yu et al       | 2017 | China     | In vitro                 | Ag                             | 20      | -               | 2, 4, 6 and 8 Gy | 6 MV            | CNE                 | Apoptosis and Cell cycle arrest | -                   |
| 82 | Youkhana et al | 2017 | Australia | In vitro                 | TiO <sub>2</sub>               | 30 ± 5  | 0.5, 1 and 4 mM | -                | 80 kVp          | HaCaT               | ROS                             | 1.17, 1.34 and 1.56 |
|    |                |      |           |                          |                                |         |                 |                  | 6 MV            |                     |                                 | 1.13, 1.18 and 1.37 |
|    |                |      |           |                          |                                |         |                 |                  | 80 kV           | DU145               |                                 | 1.21, 1.4 and 1.68  |

Supplementary file 1

|    |               |      |          |          |                     |              |                    |         |                        |                                                              |                    |                    |
|----|---------------|------|----------|----------|---------------------|--------------|--------------------|---------|------------------------|--------------------------------------------------------------|--------------------|--------------------|
|    |               |      |          |          |                     |              |                    |         | 6 MV                   |                                                              |                    | 1.1, 1.19 and 1.43 |
| 83 | Yoo et al,    | 2016 | Ca       | In vitro | Gd(OH) <sub>3</sub> | -            | 0.144 and 0.360 mM | 3 Gy    | 300 kV                 | MDA-MB-231                                                   | -                  | -                  |
| 84 | Karim et al.  | 2016 | USA      | In vitro | Au                  | 1.4          | 5 mM               | 2 Gy    | 220 kVp                | PC-3                                                         | -                  | 2.65               |
| 85 | Xu et al      | 2012 | China    | In vitro | Au                  | 15           | 0.253 mM           | 2 Gy    | 6 MV                   | A375                                                         | Cell cycle arrest  | 1.14               |
| 86 | Wu et al      | 2016 | China    | In vitro | Au                  | 15.38 ± 4.13 | 0.1 mM             | 2 Gy    | 6 MV                   | U251                                                         | ROS                | -                  |
| 87 | Wagner et al  | 2016 | CA       | In vitro | Pt                  | 1-2          | 0-5.1 mM           | 2 Gy    | 125 kVp                | BT-474, MDA-231, BT-549 and MCF-7                            | -                  | -                  |
| 88 | Taupin et al  | 2015 | FR       | In vitro | Gd                  | 3.0 ± 1.0    | 13.37 mM           | -       | 25 to 80 keV and Co-60 | F98                                                          | Apoptosis          | -                  |
| 89 | Swanner et al | 2015 | USA      | In vitro | Ag                  | 23 ± 14      | 0 – 934 mM         | 0-4 Gy  | 300 kV                 | 184B5, MCF-7, MCF-10A, MDA-MB-231, HMEC, BT-549, and SUM-159 | DNA damage and ROS | -                  |
| 90 | Shi et al     | 2016 | CA       | In vitro | Au                  | 2.77±0.69    | 1.27 mM            | 1–10 Gy | 26 keV                 | HCT116                                                       | Cell cycle arrest  | SER of 1.69        |
|    |               |      |          |          |                     |              | 0.5 mM             | 1–10 Gy |                        |                                                              |                    | SER of 1.48        |
| 91 | Saberi et al  | 2016 | Iran     | In vitro | Au                  | 50           | 0.080 mM           | 2 Gy    | 9 MV                   | HT-29                                                        | Apoptosis          | SER of 1.4         |
| 92 | Rashid et al  | 2018 | Malaysia | In vitro | Au                  | 1.9 nm       | 1 mM               | -       | 6 and 10 MV            | HeLa                                                         | Apoptosis          | -                  |

Supplementary file 1

|                |                     |      |                   |                      |                                        |                 |              |               |         |                          |                      |                           |
|----------------|---------------------|------|-------------------|----------------------|----------------------------------------|-----------------|--------------|---------------|---------|--------------------------|----------------------|---------------------------|
| <sup>93</sup>  | Popovtzer et al     | 2016 | Israel            | In vivo<br>(36 mice) | Au                                     | 30              | -            | -             | 6 MV    | A431                     | Apoptosis            | -                         |
| <sup>94</sup>  | Pagáčová<br>1 et al | 2019 | Czech<br>Republic | In vitro             | Au                                     | 2.4             | 0.5 mM       | 2 and 4<br>Gy | Cs-137  | HeLa, U87, and<br>SKBr-3 | DNA damage           | -                         |
|                |                     |      |                   |                      | Pt                                     | 2.6             | 0.5 mM       | 2 and 4<br>Gy | Cs-137  | HeLa, U87, and<br>SKBr-3 |                      | -                         |
| <sup>95</sup>  | Morita et al        | 2016 | Japan             | -                    | PAA-TiO <sub>2</sub> /H <sub>2</sub> O | 124 ± 65        | 5.0<br>mg/ml | -             | X-rays  | distilled water          | ROS                  | -                         |
| <sup>96</sup>  | Mafakhei et al      | 2016 | Iran              | In vitro             | Fe <sub>2</sub> O <sub>3</sub>         | -               | 0.125<br>mM  | -             | 6 MV    | HeLa                     | Apoptosis            | 1.19±0.15                 |
|                |                     |      |                   |                      |                                        |                 | 0.313<br>mM  |               |         |                          |                      | 1.49±0.11                 |
| <sup>97</sup>  | Luchette et al      | 2014 | USA               | In vitro             | Gd                                     | 5               | 0.5 mM       | 4 Gy          | 220 kVp | HeLa                     | Apoptosis            | SER was 1.54              |
|                |                     |      |                   |                      |                                        |                 |              | 4 Gy          | 6 MV    |                          |                      | SER was 1.28              |
| <sup>98</sup>  | Lu et al            | 2019 | UK                | In vitro             | La <sub>2</sub> O <sub>3</sub>         | 100             | 0.040<br>mM  | 0 and 3<br>Gy | 250 kV  | U-87 MG and<br>Mo59K     | ROS                  | -                         |
|                |                     |      |                   |                      | CeO <sub>2</sub>                       | 50              |              |               |         |                          |                      |                           |
|                |                     |      |                   |                      | CeO <sub>2</sub> -Gd                   | 100             |              |               |         |                          |                      |                           |
|                |                     |      |                   |                      | Nd <sub>2</sub> O <sub>3</sub>         | 100             |              |               |         |                          |                      |                           |
|                |                     |      |                   |                      | Gd <sub>2</sub> O <sub>3</sub>         | 100             |              |               |         |                          |                      |                           |
| <sup>99</sup>  | Liu et al           | 2010 | Taiwan            | In vitro             | Au                                     | 10              | 0.500<br>mM  | -             | 6 MeV   | EMT-6                    | Cell cycle<br>arrest | -                         |
| <sup>100</sup> | Liu et al           | 2018 | China             | In vitro             | Ag                                     | 26.87 ±<br>3.68 | 0.299<br>mM  | -             | 6 MeV   | U251                     | Cell cycle<br>arrest | SER was 1.78              |
|                |                     |      |                   |                      |                                        |                 | 0.324<br>mM  |               |         |                          |                      | SER was 1.34              |
|                |                     |      |                   |                      |                                        |                 | 0.255<br>mM  |               |         | C6                       |                      | SER was 1.84              |
|                |                     |      |                   |                      |                                        |                 | 0.303<br>mM  |               |         |                          |                      | SER was 1.45              |
| <sup>101</sup> | Berbeco et al       | 2012 | USA               | In vitro             | Au                                     | 50              | 0.25 mM      | 4 Gy          | 6 MV    | HeLa                     | DNA damage           | -                         |
| <sup>102</sup> | Cui et al           | 2014 | China             | In<br>vitro          | DOC and<br>DOC-NPs                     | 85              | -            | -             | 4 MeV   | BGC823                   | ROS<br>and           | SER were 1.09 and<br>1.35 |

**Supplementary file 1**

|                |             |      |           |          |                                |     |         |      |          |         |                           |                         |
|----------------|-------------|------|-----------|----------|--------------------------------|-----|---------|------|----------|---------|---------------------------|-------------------------|
|                |             |      |           |          |                                |     |         |      |          | SGC7901 | cell cycle arrest         | SER were 1.02 and 1.2   |
|                |             |      |           |          |                                |     |         |      |          | MKN45   |                           | SER were 1.11 and 1.21  |
|                |             |      |           |          |                                |     |         |      |          | GES-1   |                           | SERs were 1.05 and 1.07 |
| <sup>103</sup> | Gara et al  | 2012 | Argentina | In vitro | Si                             | 3±1 | 17.8 mM | -    | 4 MeV    | C6      | ROS                       | -                       |
| <sup>104</sup> | Jin et al   | 2007 | China     | In vitro | paclitaxel-loaded PLGA         | 500 | -       | -    | 1.25 MeV | MCF-7   | ROS and cell cycle arrest | SER was 1.4             |
| <sup>105</sup> | K.A et al   | 2018 | Malaysia  | In vitro | Pt                             | 29  | 0.1 mM  | -    | 6 MV     | HeLa    | Apoptosis                 | SER was 1.96            |
|                |             |      |           |          |                                | 36  |         |      |          |         |                           | SER was 2.31            |
|                |             |      |           |          |                                | 42  |         |      |          |         |                           | SER was 2.27            |
|                |             |      |           |          |                                | 52  |         |      |          |         |                           | SER was 1.77            |
| <sup>106</sup> | Khoie et al | 2014 | Iran      | In vitro | Fe <sub>3</sub> O <sub>4</sub> | 20  | 4.3 mM  | 2 Gy | 6 MV     | DU145   | DNA damage                | 1.24                    |
|                |             |      |           |          |                                |     |         | 4 Gy |          |         |                           | 1.22                    |
|                |             |      |           |          |                                |     |         | 6 Gy |          |         |                           | 1.21                    |

SD: Study design, NPs: Nanoparticles, Con: concentration, DEF: dose enhancement factor and SER: Sensitizer enhancement ratio, PAA-TiO<sub>2</sub>/H<sub>2</sub>O: Poly acrylic acid-modified titanium dioxide with hydrogen peroxide, DOC: Docetaxel and Docetaxel-loaded-poly (ethyleneglycol)-poly (varepsilon-caprolactone) NPs , PLGA: poly(D,L-lactide-co-glycolide) NPs containing paclitaxel, ROS: reactive oxygen species.
